# Supplementary material for: Simulating barrier island response to sea level rise with the barrier island and inlet environment (BRIE) model v1.0
Source: Copernicus journal article supplement (doi:10.5194/gmd-12-4013-2019), 2019-09-12
Supplement: Supplementary file 1 [file gmd-12-4013-2019-supplement.zip]

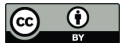

## *Supplement of*

# **Simulating barrier island response to sea level rise with the barrier island and inlet environment (BRIE) model v1.0**

**Jaap H. Nienhuis and Jorge Lorenzo-Trueba**

*Correspondence to:* Jaap H. Nienhuis ([j.h.nienhuis@uu.nl](mailto:j.h.nienhuis@uu.nl))

- [gmd-12-4013-2019-supplement-title-page.pdf](#)
- [DataS1.mat](#)
- [MovieS1.gif](#)

The copyright of individual parts of the supplement might differ from the CC BY 4.0 License.
